# Supplementary material for: Scent test using Caenorhabditis elegans to screen for early-stage pancreatic cancer
Source: PubMed Central journal article supplement (PMC8378769; doi:10.18632/oncotarget.28035), 2021-08-17
Supplement: oncotarget-12-1687-s001.pdf [file oncotarget-12-1687-s001.pdf]

# Scent test using *Caenorhabditis elegans* to screen for early-stage pancreatic cancer

## SUPPLEMENTARY MATERIALS

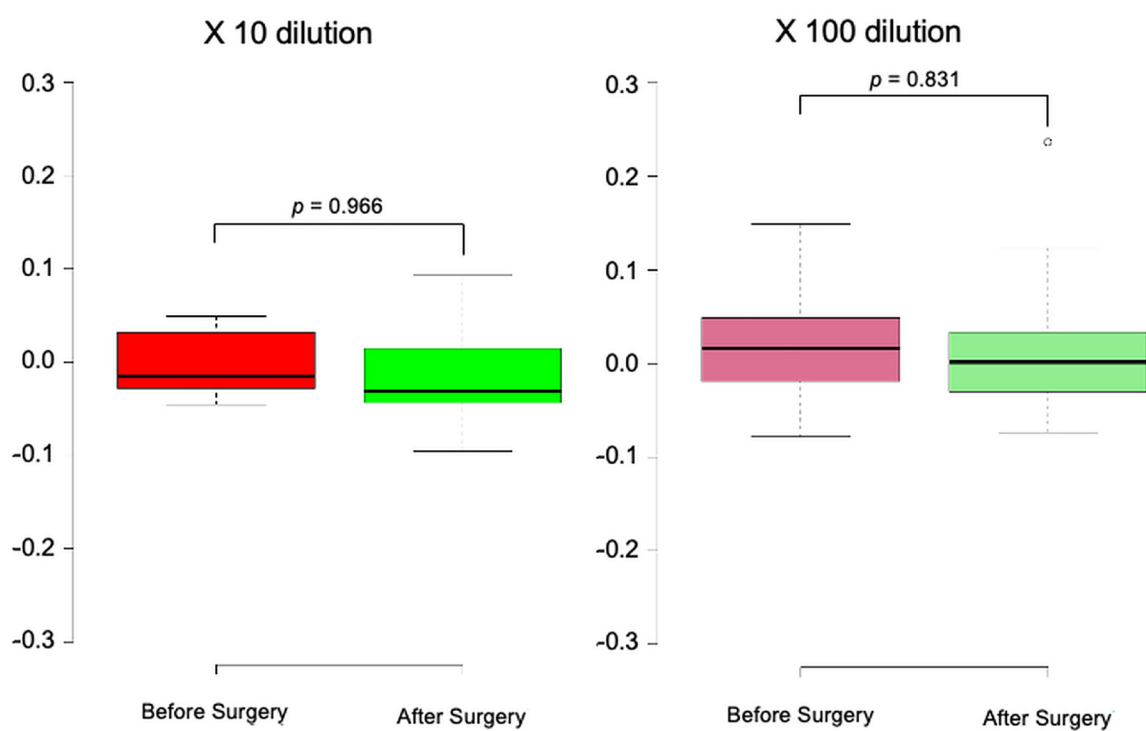

Supplementary Figure 1: Scent test using *Caenorhabditis elegans* for the diagnosis of early pancreatic ductal adenocarcinoma in the blinded study.
